# Supplementary material for: Spontaneous dormancy protects Trypanosoma cruzi during extended drug exposure
Source: eLife journal article supplement (doi:10.7554/elife.34039), 2018-03-26
Supplement: supp [file elife_poa_e34039_Figure_1_source_data_1.xlsx]

## Sheet: Figure1C-source data
Post-treatment (hs)	BZN-treated										Untreated
0	249000	279000	64300	70000	302000	179000	150000	230000	212000	301000	112000	163000
6	219000	392000	165000	140000	367000	134000	160000	268000	213000	302000	826000	913000
12	113000	233000	53200	59200	165000	32100	109000	173000	131000	129000	412000	627000
18	60000	120000	60000	60000	120000	30000	35000	50000	60000	60000	300000	650000
24	32500	68200	75700	73800	116000	22100	29700	36000	53700	49200	321000	661000
48	32100	67100	21900	27000	27700	15300	4270	8710	3970	5510	916000	1400000
Luminescent readings, footpads

## Sheet: Figure 1F-source data
Days Post infection	CL-3 Treated						ARC-0704 treated						Colombiana treated						Colombiana Untreated						Limit of Detection
12	46810000	30280000	39220000	46810000	30280000	39220000	468100000	302800000	392200000	468100000	302800000	392200000	1670000000	2800000000	3170000000	1980000000	1380000000	3290000000	2440000000	1070000000	818000000	686000000	2500000000	827000000	1000000	1000000
13	13400000	18480000	4860000	13400000	18480000	4860000	14000000	24800000	18600000	13400000	18480000	18600000	135000000	42100000	84000000	58000000	95400000	26100000	1760000000	4480000000	1830000000	1090000000	1490000000		1000000	1000000
15	1000000	1000000	1000000	1000000	1000000	1000000	5580000	3080000	2090000	1250000	1490000	5180000	5580000	3080000	20900000	12500000	14900000	9180000	1700000000	708000000	1380000000	859000000	3970000000	1010000000	1000000	1000000
17	1000000	1000000	1000000	1000000	1000000	1000000	1000000	1000000	1000000	1000000	1000000	1000000	2090000	2020000	486000	190000	597000		1070000000	1500000000	5130000000	1140000000	1260000000	653000000	1000000	1000000
Luminescent readings, whole body
