# Supplementary material for: Spontaneous dormancy protects Trypanosoma cruzi during extended drug exposure
Source: eLife journal article supplement (doi:10.7554/elife.34039), 2018-03-26
Supplement: supp [file elife_poa_e34039_Figure_7_figure_supplement_1_source_data_1.xlsx]

## Sheet: AN14353
Days after adding drug	no drug						1-day incubation						2-day incubation						3-day incubation						4-day incubation						5-day incubation						6-day incubation						all time
0	705	702	654	763	726	758	730	764	666	723	708	775	700	707	686	725	720	738	679	711	725	722	742	697	704	723	704	725	718	712	731	673	704	722	705	720	712	771	737	696	712	746	729	703	730	732	733	744
1	1040	1132	1003	1034	973	895	673	662	639	671	675	710	646	682	646	672	675	676	674	656	670	657	656	686	663	661	632	649	673	686	626	684	658	663	648	681	656	655	647	686	648	688	646	697	656	664	686	692
2	2931	3173	2918	2975	2566	2150	659	664	668	666	672	702	679	678	714	696	713	710	668	702	645	682	725	645	647	684	656	676	621	699	693	658	694	694	659	670	661	708	672	705	663	733	637	704	681	656	676	739
3	5907	6400	5588	5880	5384	4225	684	711	707	746	698	699	681	642	674	683	694	680	730	714	673	732	726	726	708	758	733	686	747	699	684	717	711	706	748	733	692	703	707	739	727	747	676	715	680	731	703	741
4	9175	9299	8270	8974	7824	7149	724	756	780	729	758	735	734	716	779	770	722	736	597	582	603	614	585	585	711	715	731	730	749	722	754	734	735	731	723	807	714	768	747	732	712	754	759	738	736	773	739	761
5	12039	12137	11585	12243	10605	10012	738	746	754	741	717	716	719	752	726	966	706	767	574	591	583	585	591	576	532	587	585	592	603	595	719	731	734	729	712	716	720	719	726	724	722	754	714	748	711	733	666	753
6							723	745	808	764	787	757	715	742	743	769	778	738	550	601	587	598	617	594	560	603	577	599	579	601	605	610	632	624	636	625	724	733	700	754	740	684	692	713	719	746	732	741
7							805	831	853	824	788	817	773	784	833	816	821	786	615	621	665	587	645	654	631	619	633	596	668	722	655	638	707	682	705	746	602	699	659	641	673	656	712	752	765	748	754	817
10							852	908	848	812	769	828	795	825	840	815	726	776	553	603	622	609	589	587	574	593	648	633	593	579	627	624	653	638	651	626	608	617	621	610	603	678	651	699	709	728	688	701
11							908	924	871	763	785	812	741	855	827	766	690	701	515	565	627	537	546	545	507	560	628	531	562	572	529	545	581	575	589	571	534	578	554	607	575	582	579	609	609	665	654	646
12							1231	1318	1142	938	883	1035	926	1132	1075	908	772	762	583	685	779	608	569	633	565	675	798	657	634	603	638	679	691	640	633	645	610	631	641	640	623	669	689	754	729	762	682	779
13							1455	1505	1352	1003	891	1160	1077	1289	1105	897	656	736	532	674	721	590	546	542	508	615	778	568	628	535	605	620	614	618	621	589	551	573	572	610	561	596	643	673	665	693	665	676
14							1742	1863	1614	1050	1006	1370	1348	1635	1415	927	636	678	639	647	788	573	508	551	521	698	810	587	636	509	556	583	626	596	555	571	517	551	542	592	536	535	641	673	664	691	635	685
17							4312	3815	2876	1585	1355	2760	2491	3742	2409	1464	869	866	1177	1071	1336	837	638	585	690	808	1013	740	632	639	629	651	679	663	663	627	575	619	590	606	603	573	704	710	699	742	719	738
18							6264	5413	3872	1957	1427	3806	3426	5221	3101	1751	813	848	1379	1265	1543	911	636	558	721	848	920	695	586	741	577	625	607	623	559	604	556	551	544	575	534	568	658	720	665	670	716	718
19							7728	7226	5373	2769	1734	5409	5029	6838	4625	2382	916	948	1939	1682	1949	1053	680	554	897	960	1068	749	639	843	614	600	615	642	621	634	572	644	560	556	598	569	690	718	723	769	680	761
20							7976	8047	6706	3644	2216	6718	6667	7883	6354	3270	1017	1090	3035	2436	2395	1389	773	619	1188	1256	1196	820	666	958	646	643	634	631	591	587	567	655	563	582	545	585	694	715	754	741	717	713
21													6939	7776	7063	4086	1034	1299	4155	3261	3044	1805	818	537	1493	1601	1495	860	690	1080	623	633	654	609	602	639	585	606	550	515	571	576	686	726	708	692	711	707
25																			5008	4920	4906	3327	1825	583	2667	3544	2791	1576	854	1892	668	656	630	637	654	638	675	612	616	648	550	563	751	717	731	746	723	745
26																									2983	3384	3001	1632	831	2231	608	652	665	629	619	604	629	643	600	572	582	606	706	707	731	735	700	734
