# Supplementary material for: Spontaneous dormancy protects Trypanosoma cruzi during extended drug exposure
Source: eLife journal article supplement (doi:10.7554/elife.34039), 2018-03-26
Supplement: supp [file elife_poa_e34039_Figure_7_figure_supplement_2_source_data_1.xlsx]

## Sheet: Sheet1
2017-11-17
	1	2	3	4	5	6	7	8	9	10	11	12
A	?????	?????	?????	?????	?????	?????	?????	?????	?????	?????	?????	?????	Mean RFU [area scan:555,585]
B	Col-luc-Tdt	1306	1318	1304	1302	1338	1332	1325	1308	1322	1303	?????	Mean RFU [area scan:555,585]
C		1305	1269	1288	1299	1346	1335	1349	1315	1318	1334	?????	Mean RFU [area scan:555,585]
D	11F	1278	1274	1265	1293	1302	1283	1261	1255	1262	1309	?????	Mean RFU [area scan:555,585]
E		1276	1287	1310	1319	1226	1301	1245	1320	1305	1219	?????	Mean RFU [area scan:555,585]
F	?????	?????	?????	?????	?????	?????	?????	?????	?????	?????	?????	?????	Mean RFU [area scan:555,585]
G	?????	?????	?????	?????	?????	?????	?????	?????	?????	?????	?????	?????	Mean RFU [area scan:555,585]
H	?????	?????	?????	?????	?????	?????	?????	?????	?????	?????	?????	?????	Mean RFU [area scan:555,585]
2017-11-20
	1	2	3	4	5	6	7	8	9	10	11	12
A	?????	?????	?????	?????	?????	?????	?????	?????	?????	?????	?????	?????	Mean RFU [area scan:555,585]
B	Col-luc-Tdt	1377	1479	1727	2078	2164	2341	2392	2331	2344	2126	?????	Mean RFU [area scan:555,585]
C		1406	1552	1848	2041	2189	2351	2295	2123	2265	2226	?????	Mean RFU [area scan:555,585]
D	11F	1450	1792	2092	2546	2374	2623	2731	2589	2565	2632	?????	Mean RFU [area scan:555,585]
E		1469	1760	2269	2828	2303	2910	2774	2779	2675	2435	?????	Mean RFU [area scan:555,585]
F	?????	?????	?????	?????	?????	?????	?????	?????	?????	?????	?????	?????	Mean RFU [area scan:555,585]
G	?????	?????	?????	?????	?????	?????	?????	?????	?????	?????	?????	?????	Mean RFU [area scan:555,585]
H	?????	?????	?????	?????	?????	?????	?????	?????	?????	?????	?????	?????	Mean RFU [area scan:555,585]

## Sheet: Col-luc-Tdt
drug 25:			IC50 (uM):			IC90 (uM):
Day 0
5	2.5	1.25	0.625	0.3125	0.15625	0.078125	0.0390625	0.0195312	no drug	Concentraion: um
1306	1318	1304	1302	1338	1332	1325	1308	1322	1303
1305	1269	1288	1299	1346	1335	1349	1315	1318	1334
									1318.5
Day 3
5	2.5	1.25	0.625	0.3125	0.15625	0.078125	0.0390625	0.0195312	no drug	Concentraion: um
1377	1479	1727	2078	2164	2341	2392	2331	2344	2126
1406	1552	1848	2041	2189	2351	2295	2123	2265	2226
									2304.5
X	% of Maximal Growth
Conc(uM)	Y1	Y2	Y3
5	7.20081	10.2434	0
2.5	16.3286	28.7018	0
1.25	42.9006	56.7951	0
0.625	78.7018	75.2535	0
0.3125	83.7728	85.497	0
0.15625	102.333	103.043	0
0.078125	108.215	95.9432	0
0.0390625	103.753	81.9473	0
0.0195312	103.651	96.0446	0

## Sheet: 11F
drug 25:			IC50 (uM):			IC90 (uM):
Day 0
5	2.5	1.25	0.625	0.3125	0.15625	0.078125	0.0390625	0.0195312	no drug	Concentraion: um
1278	1274	1265	1293	1302	1283	1261	1255	1262	1309
1276	1287	1310	1319	1226	1301	1245	1320	1305	1219
									1264
Day 3
5	2.5	1.25	0.625	0.3125	0.15625	0.078125	0.0390625	0.0195312	no drug	Concentraion: um
1450	1792	2092	2546	2374	2623	2731	2589	2565	2632
1469	1760	2269	2828	2303	2710	2774	2779	2675	2435
									2684
X	% of Maximal Growth
Conc(uM)	Y1	Y2	Y3
5	12.1127	13.5915	0
2.5	36.4789	33.3099	0
1.25	58.2394	67.5352	0
0.625	88.2394	106.268	0
0.3125	75.493	75.8451	0
0.15625	94.3662	99.2254	0
0.078125	103.521	107.676	0
0.0390625	93.9437	102.746	0
0.0195312	91.7606	96.4789	0
