# Supplementary material for: Spontaneous dormancy protects Trypanosoma cruzi during extended drug exposure
Source: eLife journal article supplement (doi:10.7554/elife.34039), 2018-03-26
Supplement: supp [file elife_poa_e34039_Figure_7_source_data_1.xlsx]

## Sheet: BNZ
Days after adding drug	no BNZ						2 day incubation						4 day incubation						6 day incubation						10 day incubation						16 day incubation						30 day incubation
1	1080	1089	1087	1071	1083	1126	1085	1077	1127	1132	1127	1073	1084	1090	1079	1085	1117	1133	1110	1103	1069	1088	1068	1133	1132	1103	1119	1084	1151	1099	1106	1104	1100	1109	1102	1058	1108	1122	1106	1095	1090	1120
2	1325	1367	1406	1395	1383	1382	1080	1051	1070	1085	1085	1092	1088	1089	1110	1063	1093	1104	1080	1092	1091	1098	1117	1086	1109	1095	1067	1134	1071	1042	1111	1099	1127	1058	1108	1066	1111	1076	1076	1123	1063	1137
3	2437	2522	2498	2430	2476	2453	1087	1099	1119	1142	1137	1128	1128	1147	1136	1159	1117	1095	1164	1143	1142	1160	1128	1128	1102	1133	1163	1140	1114	1157	1163	1159	1182	1158	1154	1124	1126	1118	1116	1073	1121	1116
4							1114	1169	1158	1175	1205	1152	1129	1162	1142	1146	1107	1128	1093	1087	1130	1124	1112	1140	1144	1114	1090	1146	1146	1137	1188	1141	1170	1116	1150	1137	1094	1072	1085	1157	1091	1163
5							1174	1185	1214	1238	1270	1212	1152	1115	1156	1157	1105	1146	1122	1131	1161	1165	1139	1139	1129	1114	1166	1109	1119	1150	1190	1156	1212	1135	1192	1147	1157	1167	1120	1124	1155	1114
6							1220	1204	1266	1321	1401	1293	1179	1147	1134	1187	1165	1148	1164	1140	1193	1121	1176	1145	1122	1134	1147	1124	1129	1119	1176	1128	1170	1155	1147	1157	1145	1128	1108	1147	1128	1118
7							1364	1365	1463	1522	1575	1564	1164	1184	1196	1175	1178	1140	1120	1124	1141	1128	1147	1170	1145	1119	1141	1097	1164	1127	1147	1105	1172	1193	1155	1104	1126	1116	1123	1126	1139	1161
8							1915	1840	2076	2072	2104	2137	1133	1146	1167	1177	1156	1146	1080	1103	1154	1106	1103	1088	1127	1108	1084	1088	1096	1092	1113	1113	1058	1066	1097	1056	1101	1042	1089	1024	1086	1112
9							2320	2211	2386	2286	2297	2528	1361	1356	1384	1401	1383	1321	1132	1135	1169	1172	1193	1125	1154	1153	1169	1114	1182	1133	1116	1110	1128	1156	1159	1120	1154	1117	1077	1136	1120	1108
11													2027	2180	2130	2330	2119	1969	1085	1113	1128	1124	1114	1112	1094	1143	1086	1125	1126	1107	1131	1128	1117	1145	1108	1075	1062	1100	1098	1114	1122	1103
13													2320	2347	2295	2500	2301	2190	1175	1226	1277	1287	1200	1217	1084	1101	1102	1124	1087	1111	1119	1167	1190	1127	1190	1105	1103	1160	1117	1137	1105	1165
14																			1151	1268	1310	1318	1253	1318	1055	1130	1083	1059	1085	1047	1122	1124	1115	1140	1122	1116	1088	1102	1097	1119	1120	1163
15																			1233	1260	1321	1307	1219	1333	1058	1041	1006	1051	1078	1060	1099	1113	1143	1106	1123	1095	1100	1121	1087	1109	1088	1107
16																			1224	1308	1397	1376	1281	1288	1047	1062	1068	1063	1093	1058	1119	1134	1130	1076	1112	1104	1148	1151	1114	1088	1134	1126
19																			1546	1805	1890	1868	1602	1625	1051	1095	1134	1062	1090	1069	1077	1073	1079	1061	1084	1061	1064	1056	1075	1095	1041	1113
20																									1075	1114	1110	1087	1072	1088	1058	1052	1081	1066	1080	1079	1068	1053	1110	1054	1084	1030
21																									1073	1049	1055	1104	1034	1117	1023	1043	1064	1011	1024	1046	1065	1046	1048	1047	1075	1046
22																									1080	1081	1092	1074	1096	1090	1073	1080	1057	1044	1096	1032	1083	1083	1071	1039	1037	1064
23																									1123	1081	1056	1088	1085	1076	1056	1027	1047	1056	1092	1045	1071	1081	1073	1084	1059	1096
26																									1058	1050	1094	1048	1044	1078	1041	1058	1040	1041	1077	1072	1056	1069	1069	1077	1027	1056
27																									1111	1044	1064	1053	1027	1063	1013	1072	1018	1053	1028	1054	1050	1043	1085	1027	1021	1048
29																									1199	1006	1098	1068	1057	1048	1043	1060	1030	1020	1073	1056	1020	1017	1068	1028	1057	1066
30																									1345	1077	1033	1042	1045	1045	1058	1022	1054	1049	1054	1070	1044	1046	1044	1041	1007	986
33																									2816	1080	1075	1091	1083	1055	1042	1025	1066	1035	1046	1055	1037	1064	1066	1052	1061	1029
35																									3053	1098	1119	1092	1102	1107	1099	1082	1121	1097	1101	1108	1107	1124	1114	1122	1092	1105
36																									3092	1131	1128	1083	1114	1121	1107	1131	1088	1082	1100	1075	1071	1087	1086	1124	1104	1077
37																															1085	1131	1087	1121	1145	1126	1079	1109	1078	1098	1090	1141
40																															1069	1067	1033	1110	1040	1036	1075	1020	1043	1041	1043	1050
42																															1091	1443	1060	1104	1114	1114	1100	1086	1109	1071	1125	1080
43																															1038	2487	1023	1053	1030	1059	1030	1020	1057	1077	1164	994
44																															1082	3172	1063	1077	1129	1102	1071	1051	1077	1062	1335	1067
47																																					1081	1097	1085	1107	1406	1075
48																																					1087	1054	1083	1097	1562	1067
50																																					1093	1043	1038	1020	1465	1071
53																																					1065	1041	1070	1070	1624	1017
54																																					1080	1028	1096	1073	1514	1074
